# Supplementary material for: Documented Use of Piperacillin–Tazobactam and Increased 1-Month Mortality in Healthcare-Associated Intra-Abdominal Infections
Source: Research Square preprint supplement (doi:10.21203/rs.3.rs-7670497/v1), 2025-10-08
Supplement: Supplementary file 1 [file 1765f8dd44f43b108ed341bf.docx]

|  | **Baseline characteristics of patients** | | | |
| --- | --- | --- | --- | --- |
| **Variables** | **Overall**  N = 454*1* | **No TZP**  N = 321*1* | **TZP**  N = 133*1* | **p-value** |
| Age | 61 (49, 72) | 61 (49, 72) | 62 (50, 73) | 0.33 |
| Sex (male) | 236 (52%) | 175 (55%) | 61 (46%) | 0.11 |
| Year of diagnosis | 2005 (2001, 2012) | 2006 (2002, 2013) | 2003 (2000, 2006) | <0.001*2* |
| Chronic heart failure | 18 (4.0%) | 10 (3.1%) | 8 (6.1%) | 0.24 |
| Peripheral arterial disease | 42 (9.3%) | 29 (9.1%) | 13 (9.8%) | 0.93 |
| Stroke | 26 (5.8%) | 19 (5.9%) | 7 (5.3%) | 0.97 |
| Diabetes mellitus | 86 (19%) | 60 (19%) | 26 (20%) | 0.92 |
| Chronic kidney disease | 19 (4.2%) | 14 (4.4%) | 5 (3.8%) | 0.98 |
| Cirrhosis | 15 (3.3%) | 10 (3.1%) | 5 (3.8%) | 0.77*2* |
| COPD | 49 (11%) | 32 (10%) | 17 (13%) | 0.47 |
| Dementia | 4 (0.9%) | 3 (0.9%) | 1 (0.8%) | >0.99*2* |
| Gastroduodenal ulcer | 57 (13%) | 41 (13%) | 16 (12%) | 0.96 |
| Connectivitis | 18 (4.0%) | 15 (4.7%) | 3 (2.3%) | 0.35 |
| Cancer | 175 (39%) | 121 (38%) | 54 (41%) | 0.64 |
| Charlson comorbidity score | 3.00 (1.00, 5.00) | 3.00 (1.00, 5.00) | 3.00 (1.00, 5.00) | 0.57 |
| Duration of antimicrobial treatment before source control (days) | 2.5 (1.0, 5.0) | 3.0 (1.0, 6.0) | 1.0 (1.0, 4.0) | <0.001*2* |
| Broad spectrum antibiotics before hcIAI | 264 (58%) | 195 (61%) | 69 (52%) | 0.10 |
| Vasoactive drug | 302 (67%) | 207 (64%) | 95 (71%) | 0.19 |
| Bacteremia | 86 (19%) | 58 (18%) | 28 (21%) | 0.54 |
| Time from initial surgery to ICU admission (days) | 7 (4, 12) | 7 (4, 13) | 7 (4, 11) | 0.29 |
| Adequate empirical treatment | 273 (60%) | 180 (56%) | 93 (70%) | 0.008 |
| Combination therapy | 305 (67%) | 222 (69%) | 83 (62%) | 0.20 |
| **Characteristics of initial surgery** | | | | |
| Type |  |  |  | 0.89 |
| Bariatric | 82 (18%) | 59 (18%) | 23 (17%) |  |
| Timing |  |  |  | 0.47 |
| Emergency procedure | 184 (41%) | 134 (42%) | 50 (38%) |  |
| **Operative findings** | | | | |
| Location |  |  |  | 0.18 |
| Below transverse mesocolon | 199 (44%) | 134 (42%) | 65 (49%) |  |
| Above transverse mesocolon | 122 (27%) | 85 (26%) | 37 (28%) |  |
| Both | 133 (29%) | 102 (32%) | 31 (23%) |  |
| Generalized peritonitis | 107 (24%) | 80 (25%) | 27 (20%) | 0.35 |
| Anastomotic leakage | 162 (36%) | 103 (32%) | 59 (44%) | 0.017 |
| Perforation | 133 (29%) | 86 (27%) | 47 (35%) | 0.088 |
| Abscess | 87 (19%) | 71 (22%) | 16 (12%) | 0.019 |
| Unknown cause | 74 (16%) | 61 (19%) | 13 (9.8%) | 0.022 |
| **Severity scores** | | | | |
| SAPS II score | 46 (34, 57) | 44 (33, 54) | 50 (39, 60) | <0.001 |
| Day 0 (D0) total SOFA score | 8.0 (5.0, 10.0) | 7.0 (4.0, 10.0) | 8.0 (5.0, 11.0) | 0.13 |
| **Organ failure** | | | | |
| Respiratory failure | 191 (42%) | 132 (41%) | 59 (44%) | 0.59 |
| Hepatic failure | 13 (2.9%) | 8 (2.5%) | 5 (3.8%) | 0.54*2* |
| Coagulopathy | 26 (5.7%) | 16 (5.0%) | 10 (7.5%) | 0.40 |
| Circulatory failure | 298 (66%) | 204 (64%) | 94 (71%) | 0.18 |
| Neurological failure | 6 (1.3%) | 3 (0.9%) | 3 (2.3%) | 0.36*2* |
| Renal failure | 111 (24%) | 73 (23%) | 38 (29%) | 0.23 |
| *1* Median (Q1, Q3); n (%)  *2 N*on parametric tests : Wilcoxon rank sum test; Fisher’s exact test | | | | |

**eTable 1 :** Patients clinical characteristics in the baseline cohort

|  | **Baseline characteristics of patients** | | | |
| --- | --- | --- | --- | --- |
| **Microbiological data** | **Overall**  N = 454*1* | **No TZP**  N = 321*1* | **TZP**  N = 133*1* | **p-value** |
| Monomicrobial | 79 (17%) | 66 (21%) | 13 (9.8%) | 0.009 |
| MDR organisms | 182 (40%) | 132 (41%) | 50 (38%) | 0.49*2* |
| Gram negative bacteria | 330 (73%) | 218 (68%) | 112 (84%) | <0.001 |
| MDR Gram negative bacteria | 161 (35%) | 121 (38%) | 40 (30%) | 0.15 |
| *Enterobacteriaceae* | 303 (67%) | 198 (62%) | 105 (79%) | <0.001 |
| Including AmpC producers | 113 (25%) | 73 (23%) | 40 (30%) | 0.13 |
| MDR Enterobacteriaceae | 144 (32%) | 106 (33%) | 38 (29%) | 0.41 |
| *Escherichia coli* | 190 (42%) | 115 (36%) | 75 (56%) | <0.001 |
| MDR Escherichia coli | 88 (19%) | 53 (17%) | 35 (26%) | 0.023 |
| *Klebsiella spp.* | 57 (13%) | 37 (12%) | 20 (15%) | 0.38 |
| *MDR Klebsiella spp.* | 18 (4.0%) | 16 (5.0%) | 2 (1.5%) | 0.14 |
| *Enterobacter spp.* | 76 (17%) | 51 (16%) | 25 (19%) | 0.54 |
| MDR Enterobacter spp. | 41 (9.0%) | 38 (12%) | 3 (2.3%) | 0.002 |
| NF-GNB | 75 (17%) | 44 (14%) | 31 (23%) | 0.018 |
| MDR NF-GNB | 29 (6.4%) | 25 (7.8%) | 4 (3.0%) | 0.092 |
| *Pseudomonas spp.* | 67 (15%) | 37 (12%) | 30 (23%) | 0.004 |
| *Enterococcus spp.* | 217 (48%) | 139 (43%) | 78 (59%) | 0.004 |
| MDR Enterococcus spp. | 30 (6.6%) | 19 (5.9%) | 11 (8.3%) | 0.48 |
| MRSA | 12 (2.6%) | 8 (2.5%) | 4 (3.0%) | 0.75*2* |
| ESBL | 25 (5.5%) | 25 (7.8%) | 0 (0%) | 0.002 |
| Total number of MDR organisms |  |  |  | 0.49*2* |
| 0 | 272 (60%) | 189 (59%) | 83 (62%) |  |
| 1 | 139 (31%) | 100 (31%) | 39 (29%) |  |
| 2 | 35 (7.7%) | 24 (7.5%) | 11 (8.3%) |  |
| 3 | 7 (1.5%) | 7 (2.2%) | 0 (0%) |  |
| 4 | 1 (0.2%) | 1 (0.3%) | 0 (0%) |  |
| Anaerobes | 93 (20%) | 59 (18%) | 34 (26%) | 0.11 |
| Including Bacteroides spp. | 72 (16%) | 42 (13%) | 30 (23%) | 0.018 |
| Yeasts | 181 (40%) | 141 (44%) | 40 (30%) | 0.008 |
| *Candida albicans* | 130 (29%) | 102 (32%) | 28 (21%) | 0.029 |
| Other Candida species | 65 (14%) | 52 (16%) | 13 (9.8%) | 0.10 |
| *1* Median (Q1, Q3); n (%)  *2 N*on parametric tests : Wilcoxon rank sum test; Fisher’s exact test | | | | |

**eTable 2 :** Microbiological data among patients in the baseline cohort
