# Supplementary material for: Documented Use of Piperacillin–Tazobactam and Increased 1-Month Mortality in Healthcare-Associated Intra-Abdominal Infections
Source: Research Square preprint supplement (doi:10.21203/rs.3.rs-7670497/v1), 2025-10-08
Supplement: Supplementary file 2 [file 20a19d3e8858bfbbbcbb31e2.docx]

| **Subgroups** | **p.value** | **OR** | **95%CI lower limit** | **95%CI upper limit** | **Significant** |
| --- | --- | --- | --- | --- | --- |
| **Surgical findings** | | | | | |
| Abscess | **0.465** | **1.574** | 0.436 | 5.210 | **FALSE** |
| Anastomotic leakage | **0.000** | **3.762** | 1.862 | 7.759 | **TRUE** |
| Perforation | **0.001** | **3.714** | 1.698 | 8.318 | **TRUE** |
| Unknown Cause | **0.315** | **0.439** | 0.063 | 1.863 | **FALSE** |
| Non-fermenting GNB | **0.245** | **1.750** | 0.683 | 4.549 | **FALSE** |
| **Microbiological data** | | | | | |
| Enterococcus | **0.000** | **3.219** | 1.767 | 5.933 | **TRUE** |
| Fungi | **0.188** | **1.661** | 0.771 | 3.519 | **FALSE** |
| MDR GNB | **0.034** | **2.272** | 1.057 | 4.868 | **FALSE** |
| Group 3 Enterobacteriaceae | **0.514** | **1.326** | 0.561 | 3.083 | **FALSE** |
| Anaerobes | **0.000** | **6.723** | 2.448 | 20.200 | **TRUE** |
| **Initial surgery** | | | | | |
| Bariatric Surgery | **0.029** | **3.571** | 1.130 | 11.475 | **FALSE** |
| Supra-mesocolic Surgery | **0.024** | **2.153** | 1.103 | 4.195 | **FALSE** |
| Infra-mesocolic Surgery | **0.001** | **2.614** | 1.454 | 4.722 | **TRUE** |
| **Site of infection** | | | | | |
| Colorectal location | **0.020** | **2.642** | 1.164 | 6.052 | **FALSE** |
| Gastro duodenal location | **0.053** | **2.229** | 0.990 | 5.054 | **FALSE** |
| Ileo-jejunal location | **0.001** | **3.936** | 1.800 | 8.837 | **TRUE** |
| **Documented antimicrobial treatment** | | | | | |
| Aminoglycosides | **0.024** | **3.545** | 1.201 | 11.052 | **FALSE** |
| Vancomycin | **0.090** | **1.990** | 0.895 | 4.433 | **FALSE** |
| Caspofungin | **0.677** | **0.667** | 0.079 | 4.249 | **FALSE** |
| Fluconazole | **0.047** | **2.167** | 1.008 | 4.679 | **FALSE** |

**eTable 6** : Unadjusted Odds-Ratio (OR) for documented TZP use (independent variable) and 1-month mortality (dependent variable) according to specific subgroups. Threshold for statistical significance was set at 0.0025 (Bonferroni correction)

| **Subgroups** | **p.value** | **OR** | **95%CI lower limit** | | **95%CI upper limit** | **Significant** |
| --- | --- | --- | --- | --- | --- | --- |
| **Surgical findings** | | | | | | |
| Abscess | **0.715** | **0.758** | 0.161 | 3.265 | | **FALSE** |
| Anastomotic leakage | **0.016** | **2.924** | 1.236 | 7.106 | | **FALSE** |
| Perforation | **0.074** | **2.356** | 0.914 | 6.094 | | **FALSE** |
| Unknown Cause | **0.313** | **0.392** | 0.048 | 2.111 | | **FALSE** |
| **Microbiological data** | | | | | | |
| Non-fermenting GNB | **0.782** | **1.185** | 0.347 | 3.958 | | **FALSE** |
| Enterococcus | **0.027** | **2.312** | 1.102 | 4.896 | | **FALSE** |
| Fungi | **0.532** | **1.305** | 0.560 | 2.998 | | **FALSE** |
| MDR GNB | **0.230** | **1.729** | 0.703 | 4.260 | | **FALSE** |
| Group 3 Enterobacteriaceae | **0.929** | **0.953** | 0.318 | 2.747 | | **FALSE** |
| Anaerobes | **0.025** | **4.122** | 1.219 | 15.018 | | **FALSE** |
| **Initial surgery** | | | | | | |
| Bariatric Surgery | **0.125** | **2.854** | 0.748 | 11.396 | | **FALSE** |
| Supra-mesocolic Surgery | **0.177** | **1.711** | 0.781 | 3.737 | | **FALSE** |
| Infra-mesocolic Surgery | **0.094** | **1.816** | 0.900 | 3.659 | | **FALSE** |
| **Site of infection** | | | | | | |
| Colorectal location | **0.386** | **1.592** | 0.551 | 4.591 | | **FALSE** |
| Gastro duodenal location | **0.941** | **1.038** | 0.378 | 2.759 | | **FALSE** |
| Ileo-jejunal location | **0.025** | **2.912** | 1.147 | 7.541 | | **FALSE** |
| **Documented antimicrobial treatment** | | | | | | |
| Aminoglycosides | **0.112** | **3.800** | 0.789 | 23.137 | | **FALSE** |
| Vancomycin | **0.477** | **1.415** | 0.537 | 3.687 | | **FALSE** |
| Caspofungin | **0.695** | **1.774** | 0.079 | 38.102 | | **FALSE** |
| Fluconazole | **0.334** | **1.531** | 0.642 | 3.650 | | **FALSE** |

**eTable 7** : Adjusted Odds-Ratio (OR) for documented TZP use (independent variable) and 1-month mortality (dependent variable) according to specific subgroups. Threshold for statistical significance was set at 0.0025 (Bonferroni correction)
