# Supplementary material for: Documented Use of Piperacillin–Tazobactam and Increased 1-Month Mortality in Healthcare-Associated Intra-Abdominal Infections
Source: Research Square preprint supplement (doi:10.21203/rs.3.rs-7670497/v1), 2025-10-08
Supplement: Supplementary file 3 [file 2337cd64b7189eb85e79f0cd.docx]

|  | **Before IPTW (baseline cohort)** | | | | | **IPTW pseudo-population** | | | | |
| --- | --- | --- | --- | --- | --- | --- | --- | --- | --- | --- |
| **Variables** | **Overall**  N = 454*1* | **No TZP**  N = 321*1* | **TZP**  N = 133*1* | **SMD***2* | **95% CI***2* | **Overall**  N = 910*1* | **No TZP**  N = 454*1* | **TZP**  N = 456*1* | **SMD***2* | **95% CI***2* |
| Age | 61 (49, 72) | 61 (49, 72) | 62 (50, 73) | -0.10 | -0.30, 0.10 | 61 (48, 72) | 62 (50, 72) | 60 (46, 72) | 0.04 | -0.09, 0.17 |
| Sex (male) | 236 (52%) | 175 (55%) | 61 (46%) | 0.17 | -0.03, 0.38 | 454 (50%) | 249 (55%) | 206 (45%) | 0.19 | 0.06, 0.32 |
| Year of diagnosis | 2005 (2001, 2012) | 2006 (2002, 2013) | 2003 (2000, 2006) | 0.62 | 0.42, 0.83 | 2,005.0 (2,001.0, 2,012.0) | 2,005.0 (2,002.0, 2,012.0) | 2,006.0 (2,001.0, 2,012.0) | -0.01 | -0.14, 0.12 |
| Chronic heart failure | 18 (4.0%) | 10 (3.1%) | 8 (6.1%) | 0.14 | -0.06, 0.34 | 31 (3.4%) | 14 (3.1%) | 17 (3.8%) | 0.04 | -0.09, 0.17 |
| Peripheral arterial disease | 42 (9.3%) | 29 (9.1%) | 13 (9.8%) | 0.03 | -0.18, 0.23 | 84 (9.3%) | 39 (8.7%) | 44 (9.8%) | 0.04 | -0.09, 0.17 |
| Stroke | 26 (5.8%) | 19 (5.9%) | 7 (5.3%) | 0.03 | -0.18, 0.23 | 49 (5.4%) | 26 (5.8%) | 22 (5.0%) | 0.04 | -0.09, 0.17 |
| Diabetes mellitus | 86 (19%) | 60 (19%) | 26 (20%) | 0.02 | -0.18, 0.23 | 168 (19%) | 82 (18%) | 86 (19%) | 0.02 | -0.11, 0.16 |
| Chronic kidney disease | 19 (4.2%) | 14 (4.4%) | 5 (3.8%) | 0.03 | -0.17, 0.23 | 52 (5.8%) | 19 (4.2%) | 33 (7.4%) | 0.16 | 0.03, 0.29 |
| Cirrhosis | 15 (3.3%) | 10 (3.1%) | 5 (3.8%) | 0.04 | -0.17, 0.24 | 31 (3.4%) | 16 (3.5%) | 15 (3.2%) | 0.01 | -0.12, 0.15 |
| COPD | 49 (11%) | 32 (10%) | 17 (13%) | 0.09 | -0.11, 0.29 | 128 (14%) | 44 (9.7%) | 84 (19%) | 0.28 | 0.15, 0.42 |
| Dementia | 4 (0.9%) | 3 (0.9%) | 1 (0.8%) | 0.02 | -0.18, 0.22 | 8 (0.9%) | 5 (1.1%) | 3 (0.7%) | 0.04 | -0.09, 0.17 |
| Gastroduodenal ulcer | 57 (13%) | 41 (13%) | 16 (12%) | 0.02 | -0.18, 0.22 | 113 (12%) | 62 (14%) | 51 (11%) | 0.07 | -0.06, 0.20 |
| Connectivitis | 18 (4.0%) | 15 (4.7%) | 3 (2.3%) | 0.13 | -0.07, 0.33 | 43 (4.7%) | 25 (5.6%) | 18 (3.9%) | 0.09 | -0.04, 0.22 |
| Cancer | 175 (39%) | 121 (38%) | 54 (41%) | 0.06 | -0.14, 0.26 | 345 (38%) | 178 (39%) | 167 (37%) | 0.05 | -0.08, 0.18 |
| Charlson comorbidity score | 3.00 (1.00, 5.00) | 3.00 (1.00, 5.00) | 3.00 (1.00, 5.00) | -0.06 | -0.26, 0.14 | 3.00 (1.00, 5.00) | 3.00 (1.00, 5.00) | 3.00 (1.00, 5.00) | 0.03 | -0.10, 0.16 |
| Duration of antimicrobial treatment before source control (days) | 2.5 (1.0, 5.0) | 3.0 (1.0, 6.0) | 1.0 (1.0, 4.0) | 0.43 | 0.21, 0.65 | 2.0 (1.0, 5.0) | 3.0 (1.0, 6.0) | 2.0 (1.0, 5.0) | 0.31 | 0.16, 0.45 |
| Broad spectrum antibiotics before hcIAI | 264 (58%) | 195 (61%) | 69 (52%) | 0.18 | -0.02, 0.38 | 526 (58%) | 278 (61%) | 249 (55%) | 0.13 | 0.00, 0.26 |
| Vasoactive drug | 302 (67%) | 207 (64%) | 95 (71%) | 0.15 | -0.05, 0.35 | 599 (66%) | 304 (67%) | 294 (65%) | 0.05 | -0.08, 0.18 |
| Bacteremia | 86 (19%) | 58 (18%) | 28 (21%) | 0.08 | -0.13, 0.28 | 181 (20%) | 84 (19%) | 97 (21%) | 0.07 | -0.06, 0.20 |
| Time from initial surgery to ICU admission | 7 (4, 12) | 7 (4, 13) | 7 (4, 11) | 0.09 | -0.11, 0.30 | 7 (4, 12) | 7 (4, 13) | 7 (4, 11) | 0.07 | -0.06, 0.20 |
| Adequate empirical treatment | 273 (60%) | 180 (56%) | 93 (70%) | 0.29 | 0.09, 0.49 | 559 (61%) | 253 (56%) | 306 (67%) | 0.24 | 0.11, 0.37 |
| Combination therapy | 305 (67%) | 222 (69%) | 83 (62%) | 0.14 | -0.06, 0.35 | 601 (66%) | 315 (69%) | 286 (63%) | 0.14 | 0.01, 0.27 |
| **Characteristics of initial surgery** | | | | | | | | | | |
| Type |  |  |  |  |  |  |  |  |  |  |
| Bariatric | 82 (18%) | 59 (18%) | 23 (17%) | 0.03 | -0.17, 0.23 | 164 (18%) | 77 (17%) | 86 (19%) | 0.05 | -0.08, 0.18 |
| Timing |  |  |  |  |  |  |  |  |  |  |
| Emergency procedure | 184 (41%) | 134 (42%) | 50 (38%) | 0.08 | -0.12, 0.29 | 380 (42%) | 183 (40%) | 196 (43%) | 0.05 | -0.08, 0.18 |
| **Operative findings** | | | | | | | | | | |
| Location |  |  |  | 0.20 | -0.01, 0.40 |  |  |  | 0.27 | 0.14, 0.40 |
| Below transverse mesocolon | 199 (44%) | 134 (42%) | 65 (49%) |  |  | 412 (45%) | 186 (41%) | 226 (49%) |  |  |
| Above transverse mesocolon | 122 (27%) | 85 (26%) | 37 (28%) |  |  | 250 (27%) | 117 (26%) | 133 (29%) |  |  |
| Both | 133 (29%) | 102 (32%) | 31 (23%) |  |  | 248 (27%) | 151 (33%) | 97 (21%) |  |  |
| Generalized peritonitis | 107 (24%) | 80 (25%) | 27 (20%) | 0.11 | -0.09, 0.31 | 215 (24%) | 116 (26%) | 99 (22%) | 0.09 | -0.04, 0.22 |
| Anastomotic leakage | 162 (36%) | 103 (32%) | 59 (44%) | 0.25 | 0.05, 0.46 | 326 (36%) | 146 (32%) | 181 (40%) | 0.16 | 0.03, 0.29 |
| Perforation | 133 (29%) | 86 (27%) | 47 (35%) | 0.19 | -0.02, 0.39 | 288 (32%) | 123 (27%) | 165 (36%) | 0.20 | 0.07, 0.33 |
| Abscess | 87 (19%) | 71 (22%) | 16 (12%) | 0.27 | 0.07, 0.47 | 145 (16%) | 94 (21%) | 51 (11%) | 0.26 | 0.13, 0.39 |
| Unknown cause | 74 (16%) | 61 (19%) | 13 (9.8%) | 0.27 | 0.06, 0.47 | 145 (16%) | 91 (20%) | 54 (12%) | 0.24 | 0.11, 0.37 |
| **Severity scores** | | | | | | | | | | |
| SAPS II score | 46 (34, 57) | 44 (33, 54) | 50 (39, 60) | -0.36 | -0.57, -0.16 | 46 (33, 57) | 46 (34, 56) | 47 (32, 58) | 0.03 | -0.10, 0.16 |
| Day 0 (D0) total SOFA score | 8.0 (5.0, 10.0) | 7.0 (4.0, 10.0) | 8.0 (5.0, 11.0) | -0.16 | -0.36, 0.04 | 7.0 (4.0, 10.0) | 8.0 (5.0, 10.0) | 7.0 (3.0, 10.0) | 0.11 | -0.02, 0.24 |
| **Organ failure** | | | | | | | | | | |
| Respiratory failure | 191 (42%) | 132 (41%) | 59 (44%) | 0.07 | -0.14, 0.27 | 378 (42%) | 198 (43%) | 181 (40%) | 0.08 | -0.05, 0.21 |
| Hepatic failure | 13 (2.9%) | 8 (2.5%) | 5 (3.8%) | 0.07 | -0.13, 0.28 | 29 (3.2%) | 14 (3.1%) | 15 (3.3%) | 0.01 | -0.12, 0.14 |
| Coagulopathy | 26 (5.7%) | 16 (5.0%) | 10 (7.5%) | 0.10 | -0.10, 0.31 | 53 (5.9%) | 29 (6.3%) | 25 (5.4%) | 0.04 | -0.09, 0.17 |
| Circulatory failure | 298 (66%) | 204 (64%) | 94 (71%) | 0.15 | -0.05, 0.35 | 588 (65%) | 296 (65%) | 292 (64%) | 0.03 | -0.10, 0.16 |
| Neurological failure | 6 (1.3%) | 3 (0.9%) | 3 (2.3%) | 0.11 | -0.10, 0.31 | 11 (1.2%) | 5 (1.1%) | 6 (1.3%) | 0.02 | -0.11, 0.15 |
| Renal failure | 111 (24%) | 73 (23%) | 38 (29%) | 0.13 | -0.07, 0.34 | 221 (24%) | 102 (22%) | 119 (26%) | 0.08 | -0.05, 0.21 |
| *1*Median (Q1, Q3); n (%)  *2*Standardized Mean Difference  Abbreviation: CI = Confidence Interval | | | | | | | | | | |

**eTable 3 :** Patients clinical characteristics before (in the baseline cohort) and after inverse probability of treatment weighting (IPTW)

|  | **Before IPTW (baseline cohort)** | | | | | **IPTW pseudo-population** | | | | |
| --- | --- | --- | --- | --- | --- | --- | --- | --- | --- | --- |
| **Microbiological data** | **Overall**  N = 454*1* | **No TZP**  N = 321*1* | **TZP**  N = 133*1* | **SMD***2* | **95% CI***2* | **Overall**  N = 910*1* | **No TZP**  N = 454*1* | **TZP**  N = 456*1* | **SMD***2* | **95% CI***2* |
| Monomicrobial | 79 (17%) | 66 (21%) | 13 (9.8%) | 0.30 | 0.10, 0.51 | 147 (16%) | 93 (20%) | 54 (12%) | 0.24 | 0.11, 0.37 |
| MDR organisms | 182 (40%) | 132 (41%) | 50 (38%) | 0.07 | -0.13, 0.27 | 350 (38%) | 192 (42%) | 159 (35%) | 0.15 | 0.02, 0.28 |
| Gram negative bacteria | 330 (73%) | 218 (68%) | 112 (84%) | 0.39 | 0.19, 0.59 | 691 (76%) | 313 (69%) | 378 (83%) | 0.33 | 0.20, 0.46 |
| MDR Gram negative bacteria | 161 (35%) | 121 (38%) | 40 (30%) | 0.16 | -0.04, 0.36 | 300 (33%) | 176 (39%) | 124 (27%) | 0.25 | 0.12, 0.38 |
| *Enterobacteriaceae* | 303 (67%) | 198 (62%) | 105 (79%) | 0.38 | 0.18, 0.59 | 645 (71%) | 283 (62%) | 362 (79%) | 0.38 | 0.25, 0.51 |
| Including AmpC producers | 113 (25%) | 73 (23%) | 40 (30%) | 0.17 | -0.04, 0.37 | 256 (28%) | 107 (23%) | 150 (33%) | 0.21 | 0.08, 0.34 |
| MDR Enterobacteriaceae | 144 (32%) | 106 (33%) | 38 (29%) | 0.10 | -0.11, 0.30 | 268 (29%) | 150 (33%) | 117 (26%) | 0.16 | 0.03, 0.29 |
| *Escherichia coli* | 190 (42%) | 115 (36%) | 75 (56%) | 0.42 | 0.22, 0.63 | 404 (44%) | 165 (36%) | 239 (52%) | 0.33 | 0.20, 0.46 |
| MDR Escherichia coli | 88 (19%) | 53 (17%) | 35 (26%) | 0.24 | 0.04, 0.44 | 181 (20%) | 76 (17%) | 105 (23%) | 0.15 | 0.02, 0.28 |
| *Klebsiella spp.* | 57 (13%) | 37 (12%) | 20 (15%) | 0.10 | -0.10, 0.31 | 134 (15%) | 55 (12%) | 79 (17%) | 0.15 | 0.02, 0.28 |
| *MDR Klebsiella spp.* | 18 (4.0%) | 16 (5.0%) | 2 (1.5%) | 0.20 | -0.01, 0.40 | 27 (3.0%) | 21 (4.7%) | 5 (1.2%) | 0.20 | 0.07, 0.33 |
| *Enterobacter spp.* | 76 (17%) | 51 (16%) | 25 (19%) | 0.08 | -0.13, 0.28 | 187 (21%) | 76 (17%) | 112 (24%) | 0.21 | 0.08, 0.34 |
| MDR Enterobacter spp. | 41 (9.0%) | 38 (12%) | 3 (2.3%) | 0.38 | 0.18, 0.58 | 66 (7.3%) | 54 (12%) | 12 (2.6%) | 0.37 | 0.24, 0.50 |
| NF-GNB | 75 (17%) | 44 (14%) | 31 (23%) | 0.25 | 0.05, 0.45 | 189 (21%) | 68 (15%) | 121 (27%) | 0.31 | 0.17, 0.44 |
| MDR NF-GNB | 29 (6.4%) | 25 (7.8%) | 4 (3.0%) | 0.21 | 0.01, 0.42 | 53 (5.8%) | 40 (8.7%) | 13 (2.9%) | 0.26 | 0.13, 0.39 |
| *Enterococcus spp.* | 217 (48%) | 139 (43%) | 78 (59%) | 0.31 | 0.11, 0.51 | 469 (52%) | 192 (42%) | 277 (61%) | 0.37 | 0.24, 0.51 |
| MDR Enterococcus spp. | 30 (6.6%) | 19 (5.9%) | 11 (8.3%) | 0.09 | -0.11, 0.29 | 65 (7.1%) | 26 (5.8%) | 38 (8.4%) | 0.10 | -0.03, 0.23 |
| MRSA | 12 (2.6%) | 8 (2.5%) | 4 (3.0%) | 0.03 | -0.17, 0.23 | 26 (2.9%) | 12 (2.7%) | 14 (3.0%) | 0.01 | -0.12, 0.14 |
| ESBL | 25 (5.5%) | 25 (7.8%) | 0 (0%) | 0.41 | 0.21, 0.61 | 33 (3.6%) | 33 (7.2%) | 0 (0%) | 0.38 | 0.25, 0.51 |
| Total number of MDR organisms |  |  |  | 0.23 | 0.03, 0.44 |  |  |  | 0.28 | 0.15, 0.41 |
| 0 | 272 (60%) | 189 (59%) | 83 (62%) |  |  | 560 (62%) | 263 (58%) | 298 (65%) |  |  |
| 1 | 139 (31%) | 100 (31%) | 39 (29%) |  |  | 271 (30%) | 147 (32%) | 124 (27%) |  |  |
| 2 | 35 (7.7%) | 24 (7.5%) | 11 (8.3%) |  |  | 67 (7.4%) | 33 (7.2%) | 35 (7.6%) |  |  |
| 3 | 7 (1.5%) | 7 (2.2%) | 0 (0%) |  |  | 10 (1.1%) | 10 (2.2%) | 0 (0%) |  |  |
| 4 | 1 (0.2%) | 1 (0.3%) | 0 (0%) |  |  | 2 (0.2%) | 2 (0.4%) | 0 (0%) |  |  |
| Anaerobes | 93 (20%) | 59 (18%) | 34 (26%) | 0.17 | -0.03, 0.38 | 187 (21%) | 87 (19%) | 100 (22%) | 0.07 | -0.06, 0.20 |
| Including Bacteroides spp. | 72 (16%) | 42 (13%) | 30 (23%) | 0.25 | 0.05, 0.45 | 141 (16%) | 64 (14%) | 78 (17%) | 0.08 | -0.05, 0.21 |
| Yeasts | 181 (40%) | 141 (44%) | 40 (30%) | 0.29 | 0.09, 0.49 | 348 (38%) | 199 (44%) | 148 (33%) | 0.24 | 0.11, 0.37 |
| *Candida albicans* | 130 (29%) | 102 (32%) | 28 (21%) | 0.25 | 0.04, 0.45 | 245 (27%) | 141 (31%) | 103 (23%) | 0.19 | 0.06, 0.32 |
| Other Candida species | 65 (14%) | 52 (16%) | 13 (9.8%) | 0.19 | -0.01, 0.39 | 128 (14%) | 74 (16%) | 54 (12%) | 0.13 | 0.00, 0.26 |
| 1Median (Q1, Q3); n (%) 2Standardized Mean Difference Abbreviation: CI = Confidence Interval | | | | | | | | | | |

**eTable 4 :** Microbiological data among patients before (in the baseline cohort) and after inverse probability of treatment weighting (IPTW)
