# Supplementary material for: Documented Use of Piperacillin–Tazobactam and Increased 1-Month Mortality in Healthcare-Associated Intra-Abdominal Infections
Source: Research Square preprint supplement (doi:10.21203/rs.3.rs-7670497/v1), 2025-10-08
Supplement: Supplementary file 4 [file 90416e141f525add0718139d.docx]

|  | **IPTW pseudo-population** | | | |
| --- | --- | --- | --- | --- |
| **Variable** | **Overall**,  N = 910*1* | **No TZP**,  N = 454*1* | **TZP**,  N = 456*1* | **p-value** |
| ICU LOS (days) | 14 (7, 26) | 16 (8, 28) | 11 (6, 23) | 0.010*2* |
| ICU LOS among survivors (days) | 14 (8, 26) | 15 (9, 27) | 12 (8, 26) | 0.26*2* |
| MV duration alive (days) | 6 (3, 14) | 7 (3, 15) | 5 (2, 11) | 0.14*2* |
| Antibiotic treatment duration (days) | 10.0 (7.0, 14.0) | 10.0 (7.0, 14.0) | 10.0 (7.0, 13.0) | 0.0543 |
| ICU mortality | 272 (30%) | 138 (30%) | 134 (29%) | 0.844 |
| Hospital mortality | 316 (35%) | 157 (35%) | 158 (35%) | 0.994 |
| Time to death (days) | 16 (4, 28) | 21 (8, 30) | 10 (2, 26) | 0.0143 |
| Surgical revision | 450 (49%) | 221 (49%) | 229 (50%) | 0.784 |
| Number of surgical revisions | 0.00 (0.00, 1.00) | 0.00 (0.00, 1.00) | 1.00 (0.00, 1.00) | 0.93*2* |
| Favorable outcome | 394 (43%) | 214 (47%) | 180 (40%) | 0.204 |
| Persistent sepsis | 247 (61%) | 111 (55%) | 136 (68%) | 0.194 |
| Surgical complication | 141 (35%) | 71 (35%) | 70 (34%) | 0.924 |
| Medical complication | 120 (30%) | 61 (31%) | 59 (29%) | 0.894 |
| 1-month mortality | 273 (31%) | 122 (28%) | 151 (35%) | 0.204 |
| 1-year mortality | 425 (57%) | 217 (57%) | 208 (57%) | 0.934 |
| 5-years mortality | 492 (76%) | 263 (79%) | 229 (72%) | 0.154 |
| *1*Median (IQR); n (%)  *2Wilcoxon rank-sum test for complex survey samples*; 3t-test adapted to complex survey samples; 4 Chi-squared test with Rao & Scott's second-order correction  *LOS : length of stay, ICU : intensive care unit, MV : mechanical ventilation* | | | | |

**eTable 5 :** Patients outcomes according to documented TZP treatment in the IPTW pseudo-population. Independent variables used in the propensity score calculation were SAPSII and Charlson comorbidity scores, patients age, year of inclusion, and the timing of surgery (emergency).
